# Supplementary material
Source: MDPI journal article supplement (https://www.mdpi.com/2073-4395/8/5/77)
Supplement: s1 [file s1]

| PGR:2,4-D       | 1mg/mL                                                                            | 2 mg/mL                                                                           | 3 mg/mL                                                                            | 4 mg/mL                                                                             |
|-----------------|-----------------------------------------------------------------------------------|-----------------------------------------------------------------------------------|------------------------------------------------------------------------------------|-------------------------------------------------------------------------------------|
| Embryogenic     |  |  |  |  |
| Non-embryogenic |  |  |  |  |
| Colour of E     | White to creamy                                                                   | White to creamy                                                                   | creamy                                                                             | Creamy to yellow                                                                    |
| (a)             |                                                                                   |                                                                                   |                                                                                    |                                                                                     |

| PGR:2,4-D       | 1mg/mL                                                                              | 2 mg/mL                                                                             | 3 mg/mL                                                                              | 4 mg/mL                                                                               |
|-----------------|-------------------------------------------------------------------------------------|-------------------------------------------------------------------------------------|--------------------------------------------------------------------------------------|---------------------------------------------------------------------------------------|
| Embryogenic     |   |   |   |   |
| Non-embryogenic |  |  |  |  |
| Colour of E     | White to creamy                                                                     | Creamy to yellow                                                                    | creamy                                                                               | White to creamy                                                                       |
| (b)             |                                                                                     |                                                                                     |                                                                                      |                                                                                       |

| PGR:2,4-D       | 1mg/mL                                                                            | 2 mg/mL                                                                           | 3 mg/mL                                                                            | 4 mg/mL                                                                             |
|-----------------|-----------------------------------------------------------------------------------|-----------------------------------------------------------------------------------|------------------------------------------------------------------------------------|-------------------------------------------------------------------------------------|
| Embryogenic     | 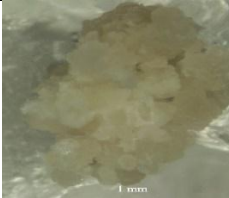 |  |  |  |
| Non-embryogenic |  |  |  |  |
| Colour of E     | White to creamy                                                                   | White                                                                             | Creamy                                                                             | Creamy to yellow                                                                    |
| (c)             |                                                                                   |                                                                                   |                                                                                    |                                                                                     |

| PGR:2,4-D       | 1mg/mL                                                                              | 2 mg/mL                                                                             | 3 mg/mL                                                                              | 4 mg/mL                                                                               |
|-----------------|-------------------------------------------------------------------------------------|-------------------------------------------------------------------------------------|--------------------------------------------------------------------------------------|---------------------------------------------------------------------------------------|
| Embryogenic     |   |   |   |   |
| Non-embryogenic |  |  |  |  |
| Colour of E     | Creamy to yellow                                                                    | Creamy to yellow                                                                    | White to creamy                                                                      | White                                                                                 |
| (d)             |                                                                                     |                                                                                     |                                                                                      |                                                                                       |

**Figure S1.** The morphology of calluses on MS media of different concentration of 2, 4-D (1-4mg/L) of (a) MR220 (b) MR220-CL2 (c) MR232 and (d) Bario.

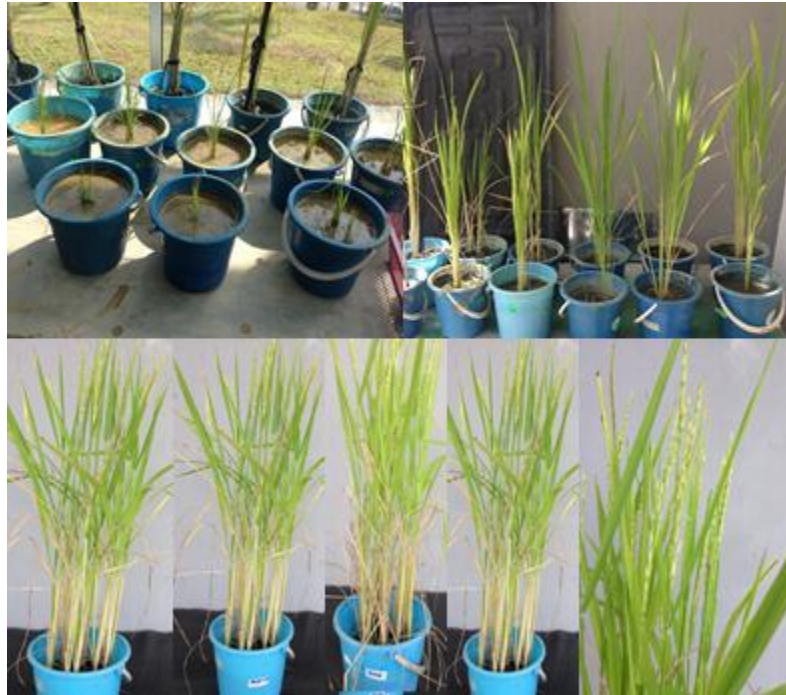

**Figure S2.** Establishment of MR220, MR220-CL2, MR232 and Bario plant through *in vitro* callus induction to ripening stage.
